1 **Widely targeted metabolomic analysis reveals differences in volatile metabolites**  
2 **among four *Angelica* species**

3 Lanlan Zang<sup>a, b, 1</sup>, Jiaojiao Ji<sup>b, c, 1</sup>, Tingting Lu<sup>b, e, f</sup>, Cheng Li<sup>b</sup>, Xiaoxu Han<sup>b</sup>, Soo-Rang  
4 Lee<sup>g</sup>, Lei Ma<sup>a, \*</sup>, Li Wang<sup>b, d, \*</sup>

5 <sup>a</sup> Zhengzhou Research Base, State Key Laboratory of Cotton Biology, School of  
6 Agricultural Sciences, Zhengzhou University, Zhengzhou 450001, China

7 <sup>b</sup> Shenzhen Branch, Guangdong Laboratory for Lingnan Modern Agriculture, Genome  
8 Analysis Laboratory of the Ministry of Agriculture, Agricultural Genomics Institute at  
9 Shenzhen, Chinese Academy of Agricultural Sciences, Shenzhen 518120, China

10 <sup>c</sup> College of Life Science and Technology, Huazhong Agricultural University, Wuhan  
11 430070, China

12 <sup>d</sup> Kunpeng Institute of Modern Agriculture at Foshan, Foshan 528200, China

13 <sup>e</sup> State Key Laboratory of Crop Stress Adaptation and Improvement, School of Life  
14 Sciences, Henan University, Kaifeng 475004, China.

15 <sup>f</sup> Shenzhen Research Institute of Henan university, Shenzhen 518000, China.

16 <sup>g</sup> Department of Biology Education, College of Education, Chosun University,  
17 Gwangju 61452, South Korea.

18 \* Correspondence authors: Li Wang (Email: wangli03@caas.cn) and Lei Ma (Email:  
19 malei2002@163.com )

20 <sup>1</sup> Contributed equally to this work.

21 **Highlights**

22 • Eight hundred and ninety-nine volatile metabolites were identified in four

23 *Angelica* species.

24 • Medicinal plants differed in the accumulation of volatile compounds: *Angelica*

25 *keiskei* is rich in bornyl acetate, while *Angelica sinensis* is rich in

26 7-hydroxycoumarin and Z-ligustilide.

27 • *Angelica keiskei* exhibited high diversity and abundance of effective volatile

28 compounds, and demonstrated its profound potential for industrial applications.

29

30 **Abstract**

31 *Angelica L.* has attracted global interest for its traditional medicinal uses and  
32 commercial values. However, few studies have focused on the metabolomic  
33 differences among the *Angelica* species. In this study, we analyzed volatile  
34 metabolites of four *Angelica* species (*Angelica sinensis* (Oliv.) Diels, *Angelica*  
35 *biserrata* (R.H.Shan & Yuan) C.Q.Yuan & R.H.Shan, *Angelica dahurica* (Hoffm.)  
36 Benth. & Hook.f. ex Franch. & Sav., *Angelica keiskei* Koidz.) by employing the  
37 widely targeted metabolomics based on gas chromatography–tandem mass  
38 spectrometry. A total of 899 volatile metabolites were identified and classified into  
39 sixteen different categories. On average, categorical abundances of volatile  
40 metabolites such as terpenoids, alcohol, ketone, and ester were higher in *Angelica*  
41 *keiskei* than those in the other three *Angelica* species. The metabolomic analysis  
42 indicated that 7-hydroxycoumarin and Z-ligustilide were accumulated at significantly  
43 higher levels in *Angelica sinensis*, whereas the opposite pattern was observed for  
44 bornyl acetate. In addition, we found a high correspondence between the dendrogram  
45 of metabolite contents and phylogenetic positions in the four species. This study  
46 provides a biochemical map for the exploitation, application and development of the  
47 *Angelica* species as medicinal plants or health-related dietary supplements.

48 **Keywords**

49 *Angelica*, volatile metabolites, Chinese traditional medicine, phylogeny

## 50 **1. Introduction**

51 *Angelica L.*, a genus in the family Apiaceae, is comprised of 90 species of herbs that  
52 are widespread in north-temperate regions, especially Eurasia (Feng et al., 2009;  
53 Sowndhararajan et al., 2017). Many plants in the genus have long been used in  
54 traditional Chinese medicine (TCM) (Sarker and Nahar, 2004), in particular, the dried  
55 roots of *Angelica* have been widely used for nourishing blood, regulating  
56 menstruation, and analgesic (Dong et al., 2022; Sowndhararajan et al., 2017). Various  
57 herbal preparations containing *Angelica* species are available over the counter, not  
58 only in China, but also in Europe and American countries (Hook, 2014; Wei et al.,  
59 2016). Besides its medicinal value, *Angelica* is also highly appreciated in various  
60 industrial applications such as the dietary supplements, perfumery, and cosmetics.  
61 (Alkan Turkucar et al., 2021; Sowndhararajan et al., 2017; Zhang et al., 2012).

62 A previous study demonstrated that the pharmacological activity of aromatic and  
63 medicinal plants is attributed to its effective volatile components (Pandey et al., 2020).  
64 Plants in *Angelica* are extremely rich in secondary metabolites, including coumarins,  
65 flavonoids, terpenoids, as well as volatiles oils (VOs) (Sarker and Nahar, 2004;  
66 Sowndhararajan et al., 2017). Modern medical research has revealed that the Vos  
67 composition is mainly responsible for the medicinal properties of the genus *Angelica*  
68 (Kumar et al., 2022). VOs are complex mixture of low molecular weight volatile  
69 compounds that are isolated from the raw plant material by distillation (Sadgrove et  
70 al., 2022), which have been reported to treat serious health diseases, involving  
71 gynecological diseases, fever, and arthritis. (Perveen et al., 2020; Sowndhararajan et

72 al., 2017). There are a couple of good examples showing the proven effects of VOs in  
73 *Angelica* species. Phthalides of *A. sinensis* are one of the highly effective VOs to  
74 analgesic and sedative activities (Du et al., 2006; Wei et al., 2016). *Angelica biserrata*  
75 also contains active ingredients such as oxygenates, terpenoids, ketones and esters  
76 with analgesic and anti-inflammatory effects (Ma et al., 2019). However, most of  
77 current studies only focused on several targeted compounds in a single *Angelica*  
78 species. There have been no comprehensive and comparative studies examining the  
79 volatile metabolites of multiple *Angelica* species. It has posed a major obstacle to the  
80 application and exploitation of the medicinal plants in *Angelica* species.

81 With the development of metabolomics, high-throughput and high-resolution methods  
82 such as headspace solid phase micro-extraction gas chromatography-mass  
83 spectrometry (HS-SPME-GC-MS) have been widely used to identify metabolite  
84 profiles and detect differences in the biochemical compositions of aromatic and  
85 medicinal plants (Chen et al., 2021; Hua et al., 2019; Kumar et al., 2022). The four  
86 species *A. biserrata*, *A. dahurica*, *A. keiskei* and *A. sinensis* are the representative  
87 medicinal plants in *Angelica*, and it is noteworthy that roots of *A. sinensis* are one of  
88 the most widely prescribed medicine in China owing to its rich VOs (Wei et al., 2016).

89 In this study, volatile metabolites of four *Angelica* species were identified and  
90 quantified using widely targeted metabolomics. The aim was to reveal the differed  
91 accumulation of medicinally important metabolites among the four species. This  
92 study provides useful information for the chemical composition of *Angelica* plants

93 and may help the identification of the biologically active substances responsible for  
94 the pharmacological activity of *Angelica* plants.

## 95 **2. Materials and Methods**

### 96 2.1. Plant samples

97 Four species in genus *Angelica*, including *A. sinensis*, *A. dahurica*, *A. biserrate*, and  
98 *A. keiskei*, were analyzed in this study. The *A. sinensis* plants were collected from  
99 Minxian County, Gansu Province, China. The *A. dahurica*, *A. biserrate*, and *A.*  
100 *keiskei* plants were collected from Shenzhen City, Guangdong Province, China.  
101 Roots of each species were sampled with three biological replicates. The collected  
102 roots were washed, naturally dried, frozen in liquid nitrogen, and then stored at -80°C  
103 for further analysis.

### 104 2.2. Solid phase microextraction (SPME) extraction

105 The samples were ground into powder in liquid nitrogen. Powdered samples (1 g)  
106 were weighed and transferred immediately to a 20 mL head-space vial (Agilent, Palo  
107 Alto, CA, USA), containing NaCl saturated solution to inhibit potential enzyme  
108 reactions. The headspace vials were sealed using crimp-top caps. As for SPME  
109 analysis, each vial was placed in 60°C for 5 min, and then a 120 µm  
110 DVB/CWR/PDMS fiber (Agilent, Palo Alto, CA, USA) was exposed to the  
111 headspace of the sample for 15 min at 100°C. The quality control (mix) sample was  
112 prepared by mixing equal volumes of samples into a single tube to check the  
113 reproducibility of the Mass Spectrometry results.

### 114 2.3. GC-MS analysis

115 After the extraction procedure, the fiber was transferred to the injection port of  
116 the GC-MS system (Model 8890; Agilent, Palo Alto, CA, USA). The SPME fiber was  
117 desorbed and maintained in the injection port at 250 °C for 5 min in the split-less mode.  
118 The identification and quantification of volatile metabolites was carried out using an  
119 Agilent Model 8890 GC and a 7000 D mass spectrometer (Agilent, Palo Alto, CA,  
120 USA), equipped with a 30 m × 0.25 mm × 0.25 µm DB-5MS (5%  
121 phenyl-polymethylsiloxane) capillary column. Helium was used as the carrier gas at a  
122 linear velocity of 1.2 mL min<sup>-1</sup>. The injector temperature was kept at 250 °C and the  
123 detector at 280 °C. The oven temperature was programmed as followings: 40 °C (3.5  
124 min), increasing at 10 °C min<sup>-1</sup> to 100 °C, 7 °C min<sup>-1</sup> to 180 °C, 25 °C min<sup>-1</sup> to 280 °C and  
125 hold for 5 mins. Mass spectra was recorded in electron impact (EI) ionization mode at  
126 70 eV. The quadrupole mass detector, ion source and transfer line temperatures were  
127 set, respectively, at 150, 230 and 280 °C. For the identification and quantification of  
128 analytes, the MS was selected ion monitoring (SIM) mode.

#### 129 2.4. Qualitative and quantitative analysis

130 After the mass spectrometry analysis, all raw data were analyzed with the software  
131 Qualitative Analysis Workflows B.08.00 (Agilent, Palo Alto, CA, USA). The  
132 qualitative analysis of primary and secondary mass spectrometry data was annotated  
133 based on the self-built database MWDB (Metware Biotechnology Co., Ltd. Wuhan,  
134 China) and the publicly available metabolite databases.

#### 135 2.5 Statistical analysis

136 After the metabolite data was transformed with Hellinger transformation,  
137 principal component analysis (PCA) was performed using the function rda in the R  
138 package vegan v 2.6-2 (Oksanen et al., 2013). The pretreated data set of annotated  
139 metabolites were imported into the R package MetaboAnalystR v1.0.1 (Chong and  
140 Xia, 2018) to conduct orthogonal partial least squares-discriminant analysis  
141 (OPLS-DA) and extract the variable important in projection (VIP) value from the  
142 analysis results. In addition, paired sample student's *t* test (*P* value < 0.05) was used  
143 to determine the significance of the differences. Based on Bray-Curtis's dissimilarity  
144 distances of the composition and abundance of volatile metabolites, which were  
145 calculated using the function vegdist built in vegan, hierarchical clustering was  
146 visualized with the R package factoextra v.1.0.7 (Lê et al., 2008).  
147 The chloroplast sequence alignments of *A. sinensis*, *A. dahurica*, *A. biserrate*, and *A.*  
148 *keiskei* were generated using MAFFT v7.475 (Kato and Standley, 2013).  
149 Phylogenetic trees were constructed by maximum likelihood using IQ-TREE v 2.1.2  
150 (Nguyen et al., 2015) with *Hydrocotyle sibthorpioides* Lam. as an outgroup.  
151 All identified metabolites were annotated with KEGG database  
152 (<http://www.kegg.jp/kegg/compound/>) and further subjected to KEGG enrichment  
153 analyses with the R package clusterProfiler v. 4.4.4 (Wu et al., 2021).

### 154 **3. Results**

#### 155 3.1. Metabolomics profiling of four *Angelica* species

156 To get insight into differences of volatile metabolites among four *Angelica*  
157 species, the root metabolomics data were generated. A total of 899 non-redundant



158 volatile metabolites were qualified and quantified based on GC-MS (Table S1).  
159 Among them, 673, 678, 730, and 793 volatile metabolites in *A. sinensis*, *A. dahurica*,  
160 *A. biserrate*, *A. keiskei*, respectively. In particular, 477 volatile metabolites were  
161 present in the roots of all four species (Fig. 1a).  
162 PCA of the metabolome data, transformed with Hellinger transformation method,  
163 demonstrated metabolic divergence among the roots of the four *Angelica* species.  
164 Based on the PCA plot, where PC1 and PC2 explained 47.79% and 30.35% of the  
165 total variance, respectively, the samples were divided into four distinct groups  
166 corresponding to the four species. Of the four clusters, PC1 mainly differentiated *A.*  
167 *sinensis* from the other *Angelica* species, while PC2 primarily segregated *A. dahurica*  
168 from the other *Angelica* species.  
169 The abundances of volatile metabolites were transformed by *Z*-score and then  
170 subjected to hierarchical clustering analysis (Fig. 1c). The results showed that the  
171 metabolites of the four *Angelica* species were evidently differentiated, and the three  
172 biological replicates were clustered together, which was consistent with the PCA plot.  
173 Taken together, these results suggested that volatile metabolites have diverged across  
174 the four *Angelica* species.

### 175 3.2. Specific characteristics of metabolites in four *Angelica* species

176 To explore the metabolite composition of the four species, 899 volatile metabolites  
177 were classified into 16 different categories, including terpenoids, ester, heterocyclic,  
178 aromatics and 12 others (Fig. 2). The terpenoids took up the highest proportion of all  
179 measured volatile metabolites in the four *Angelica* species, followed by heterocyclic

180 compounds, ester, and aromatics. Notably, *A. sinensis* contained a relatively lower  
181 proportion (41%) of terpenoids than other *Angelica* species, but exhibited a more  
182 balanced metabolite composition in volatile metabolites. In contrast, the amount of  
183 terpenoids accounted for more than half of the total volatile metabolites in *A.*  
184 *dahurica*, *A. biserrate*, and *A. keiskei*, especially in *A. dahurica*, its proportion  
185 reached up to 72.9%.

186 In addition, we compared the relative abundance of each metabolite category in the  
187 four species and found that the seven categories showed a significant difference  
188 among the four species, including alcohol, aromatics, aldehyde, ester, heterocyclic  
189 compounds, ketones and terpenoids (Fig. S1; Paired sample *t* test, the *p*-values were  
190 shown in the table S2). The relative content of terpenoids were significantly higher in  
191 *A. keiskei* than that in the other three species ( $P < 0.05$ ). The relative contents of  
192 alcohol and ester were significantly higher in *A. keiskei* than those in *A. biserrate* and  
193 *A. dahurica* ( $P < 0.05$ ), but there was no significant difference between *A. sinensis*  
194 and the other three species. In the comparison of heterocyclic compounds, the relative  
195 content in *A. keiskei*, *A. sinensis* and *A. biserrate* were significantly higher than the  
196 one observed in *A. dahurica* ( $P < 0.05$ ).

### 197 3.3. Differential metabolites between *A. sinensis* and the three other *Angelica* species

198 To further identify the differential metabolites of the four *Angelica* species, we used  
199 multivariate statistical methods with  $|\text{Log}_2\text{FC}| \geq 1$  and  $\text{VIP} \geq 1$ . As *A. sinensis* was  
200 widely utilized in prescriptions of TCM (Yeh et al., 2011) and PC1 mainly  
201 differentiated *A. sinensis* from the other three species (Fig. 1b), the comparison was

202 conducted between *A. sinensis* and the other three species. Interestingly, there were  
203 fewer up-regulated metabolites in *A. sinensis* when compared to the other species.  
204 And no significantly enriched pathway was detected in the KEGG enrichment results  
205 of these differential metabolites ( $P$ -values were showed in Table S3.), which could be  
206 a bias caused by the small dataset. Compared to *A. dahurica*, 546 significantly  
207 differential metabolites (212 up-regulated and 334 down-regulated) were detected in  
208 *A. sinensis* (Fig. 4a), and the top 3 enrichment pathways of these metabolites were  
209 tyrosine metabolism (3 metabolites with  $P = 0.21$ ), limonene and pinene degradation  
210 (5 metabolites with  $P = 0.23$ ) and metabolic pathways (23 metabolites with  $P = 0.24$ )  
211 (Fig. 4d). Compared to *A. biserrate*, 558 significantly differential metabolites (155  
212 up-regulated and 403 down-regulated) were screened in *A. sinensis* (Fig. 4b), and the  
213 top 3 enrichment pathways of these substance were metabolic pathways (24  
214 metabolites with  $P = 0.17$ ), tyrosine metabolism (3 metabolites with  $P = 0.23$ ) and  
215 limonene and pinene degradation (5 metabolites with  $P = 0.25$ ) (Fig. 4e).  
216 When compared to *A. keiskei*, 644 significantly differential metabolites (136  
217 up-regulated and 508 down-regulated) were identified in *A. sinensis* (Fig. 4c), which  
218 were the most abundant compared to the other two group, and the top 3 enrichment  
219 pathways of these metabolites were biosynthesis of various plant secondary  
220 metabolites (5 metabolites with  $P = 0.12$ ), metabolic pathways (26 metabolites with  $P$   
221 = 0.12), and monoterpene biosynthesis (9 metabolites with  $P = 0.21$ ) (Fig. 4f).  
222 In order to delve into the details of the volatile metabolite difference between *A.*  
223 *sinensis* and the other three species, the most significantly twenty metabolites (the top

224 10 for up-regulation and down-regulation, respectively) were selected (Fig. 5). It was  
225 discovered that hippuric acid, 7-hydroxycoumarin and 7-ethoxycoumarin were more  
226 enriched in *A. sinensis* than the three other *Angelica* species. In addition, the  
227 abundance of 3-butyloisobenzofuran-1(3H)-one in *A. sinensis* was also substantially  
228 higher than that in *A. dahurica* and *A. keiskei* ( $\log_2FC > 19$ ). Meanwhile, the  
229 metabolites  $\gamma$ -terpinene, 4-hydroxyphenylacetic acid, and cinnamic acid in *A.*  
230 *dahurica*, and the metabolites  $\gamma$ -terpinene, bornyl acetate in *A. keiskei* and *A. biserrate*  
231 were in high abundance, but the metabolites were lower in *A. sinensis*.

232 3.4. Differential metabolites between *A. keiskei* and the three other *Angelica* species

233 Given the abundance of metabolites in *A. keiskei*, the differences of metabolites  
234 between *A. keiskei* and the other *Angelica* species were further compared. The  
235 volcanic map visually showed the overall distribution of differential metabolites in  
236 each comparison. Six hundred and four significantly different metabolites (529  
237 up-regulated and 75 down-regulated) were detected in the comparison between *A.*  
238 *keiskei* and *A. dahurica* (Fig. 6a), which were associated with sesquiterpenoid and  
239 triterpenoid biosynthesis (8 metabolites with  $P = 0.15$ ), monoterpenoid biosynthesis  
240 (9 metabolites with  $P = 0.25$ ) and metabolic pathways (25 metabolites with  $P = 0.37$ )  
241 (Fig. 6c). Five hundred and seventeen significantly different metabolites (395  
242 up-regulated and 122 down-regulated) were detected in the comparison between *A.*  
243 *keiskei* and *A. biserrate* (Fig. 6b), which were related to phenylpropanoid biosynthesis  
244 (2 metabolites with  $P = 0.21$ ), metabolic pathways (17 metabolites with  $P = 0.41$ ) and  
245 tyrosine metabolism (2 metabolites with  $P = 0.44$ ) (Fig. 6d).

246 Moreover, to further investigate the differences of volatile metabolites in *A. keiskei*  
247 and other *Angelica* species, we subsampled twenty metabolites that were  
248 differentiated the most between the two species (Fig. 7). From the comparison, we  
249 found that carene, bornyl acetate and isobornyl acetate were the most enriched in *A.*  
250 *keiskei* compared to *A. dahurica*; and the terpenoids metabolites, carvenone and  
251 cedrene were more abundant in *A. keiskei* than that in *A. biserrate*. Additionally, the  
252  $\beta$ -pinene was more enriched in *A. dahurica* and *A. biserrate* than in *A. keiskei*.  
253 Fig. 7. Top 20 metabolites with significant difference between *A. keiskei* and *A.*  
254 *dahurica* (a), *A. keiskei* and *A. biserrate* (b). Red and green represent up-regulated and  
255 down-regulated metabolites in *A. keiskei*, respectively.

#### 256 **4. Discussion**

257 Widely targeted metabolomics offered a promising way for the chemical screening of  
258 volatile metabolites and allowed the characterization of new volatile metabolites in  
259 *Angelica* (Kumar et al., 2022). Using the method, a total of 899 volatile metabolites  
260 were identified and further classified into 16 different categories, including terpenoids,  
261 ester, heterocyclic, aromatics and 12 others (Fig. 2). A clustering heat map of the  
262 metabolites showed significant difference among the four species. The number of  
263 types and abundance of volatile metabolites in *A. keiskei* was the highest. Consistent  
264 with the previous reports, terpenoids were the largest and most diverse class of  
265 volatile metabolites in the four *Angelica* species (Abbas et al., 2017; Sowndhararajan  
266 et al., 2017). The pair wise comparisons between two species for the metabolite's  
267 differences revealed that there were fewer up-regulated metabolites in *A. sinensis*

268 when compared to the other three species (*A. dahurica*, *A. keiskei*, *A. biserrate*)  
269 whereas, relative to *A. keiskei*, most differential metabolites were down-regulated in *A.*  
270 *dahurica* and *A. biserrate*. It demonstrates that the analysis of differential metabolites  
271 is useful for understanding the differences of chemical properties among the four  
272 species.

273 *Angelica sinensis* also known as “female ginseng” is a traditional herb, which has  
274 long been used to treat various gynecological conditions (Hook, 2014; Wei et al.,  
275 2016). Z-ligustilide is believed to be responsible for the bioactivities of *A. sinensis*.  
276 (Chen et al., 2013; Wei et al., 2016). This study shows that Z-ligustilide was detected  
277 in the four species and its contents were relatively higher in *A. sinensis*, which is  
278 consistent with previous studies (Hook, 2014). In addition, Coumarin and its  
279 derivatives are one of the important heterocyclic metabolites (Wu et al., 2009), which  
280 is mainly used as anti-HIV, anticancer activity agents, and anticoagulant activities  
281 (Kim et al., 2022; Zhou et al., 2016). We observed that the contents of  
282 7-hydroxycoumarin and 7-ethoxycoumarin in *A. sinensis* were significantly higher  
283 than *A. dahurica*, *A. biserrate*, and *A. keiskei* (Fig. 2). By virtue of its structural  
284 simplicity, 7-hydroxycoumarin has been generally accepted as the parent metabolites  
285 for the furocoumarins and pyranocoumarins and is widely used as a synthon for a  
286 wide variety of coumarin-heterocycles (Han et al., 2022; Mazimba, 2017; Vanholme  
287 et al., 2019). Its higher abundance in *A. sinensis* was probably associated with  
288 biosynthesis of furocoumarins and pyranocoumarins, which were reported as one of  
289 the main active components influencing the pharmaceutical activity of the herb

290 (Pandey et al., 2020). Nevertheless, in ancient Chinese medical systems, the  
291 pharmacological effect of medicinal plants depends not only on the high abundance of  
292 a single compound, but also on the synergy of multiple active ingredients (Liu et al.,  
293 2014; Song et al., 2016). Furthermore, this study also found that the proportion of  
294 various components in volatile metabolites was more balanced in *A. sinensis* (Fig. 2).  
295 This might explain the wide and common applications of *A. sinensis* in TCM.  
296 Meanwhile, the results showed that the abundance of volatile metabolites in the root  
297 of the *A. keiskei* was the highest among the four species. It has been used as a  
298 medicine and food owing to its abundant pharmacological effects, including  
299 anti-cancer, lowering blood sugar and blood lipids, and improving human immunity  
300 (Guiné and Gonçalves, 2016; Kil et al., 2017). However, these pharmacological  
301 effects have not been validated in scientific research. To date, it is only found in the  
302 form of raw materials in tea and cosmetics, which has limited its medicinal and  
303 clinical applications (Kim et al., 2014; Rong et al., 2021). Interestingly, bornyl acetate,  
304 previously unmentioned terpenoid substances was detected with high expression  
305 levels in the root of *A. keiskei*, and it has been reported that bornyl acetate has  
306 antibacterial, insecticidal, and anesthetic effects symbiotically with other aromatic  
307 metabolites in the VOs (Liang et al., 2022). This discovery provides a basis for the  
308 development and utilization of active ingredients in *A. keiskei* for health-related  
309 dietary supplements. Taken together, this study greatly enriches the database of  
310 chemical composition in *A. keiskei* and imply that *A. keiskei* exhibited benign

311 potential to be exploited as medicinal materials and health-related dietary  
312 supplements.

313 Previous studies have verified that plants with closer phylogenetic relationship are not  
314 only similar in morphology but also in chemical composition and curative effects  
315 (Hao and Xiao, 2020; Kang et al., 2019; Saslis-Lagoudakis et al., 2011). Here, this  
316 study performed hierarchical clustering analysis based on Bray-Curtis's dissimilarity  
317 distances of the composition and abundance of volatile metabolites in the four  
318 *Angelica* species. The dendrogram (Fig. 8a) showed high correspondence with the  
319 phylogenetic tree (Fig. 8b) based on chloroplast sequences, suggesting a correlation  
320 relationship between the volatile metabolites and the phylogenetic relationships.

321 Although more extensive sampling and deeper investigations would be necessary to  
322 reveal more reliable correlations, the study implied that phylogenetic relationships  
323 could serve as a window to coarsely apprehend the unknown biochemical diversity of  
324 some plants based on the known biochemical map of phylogenetically related species.

325 This finding may offer a great tool for searching replacements of medicinal plant  
326 resources that are endangered with closely related non-endangered species.

## 327 **5. Conclusion**

328 This study investigated the metabolites of four *Angelica* species by using widely  
329 targeted metabolomics, and found the differed accumulation of medicinally important  
330 metabolites among species. For example, high levels of bornyl acetate metabolites  
331 accumulated in *A. keiskei*, whereas coumarins and phthalides were significantly lower  
332 in *A. keiskei* than in *A. sinensis*. Moreover, the high correspondence between the



333 dendrogram of metabolite contents and the phylogenetic tree suggested a potential  
334 correlation between the volatile metabolites and the phylogenetic relationships. Taken  
335 all together, we are convinced that the present study provides a biochemical map for  
336 the exploitation, application, and development of the *Angelica* species as TCM or  
337 health-related dietary supplements.

#### 338 **Credit authorship contribution statement**

339 Li Wang conceived and designed the study. Lan-Lan Zang, Jiao-Jiao Ji, Ting-Ting Lu  
340 and Xiao-Xu Han prepared the materials. Jiao-Jiao Ji and Lan-Lan Zang performed  
341 data analyses. Lan-Lan Zang and Jiao-Jiao Ji wrote the first version of the manuscript  
342 with suggestions from Li Wang. Li Cheng, Xiao-Xu Han, Soorang Lee, Lei Ma and  
343 Li Wang revised the manuscript. All authors read and approved the final manuscript.  
344 Lan-Lan Zang and Jiao-Jiao Ji contributed equally to this work.

#### 345 **Declaration of Competing Interest**

346 The authors declare that they have no known competing financial interests or personal  
347 relationships that could have appeared to influence the work reported in this paper.

#### 348 **Acknowledgements**

349 This work was supported by the National Natural Science Foundation of China (Grant  
350 No. 32070242), the National Key Research and Development Program of China  
351 (Grant No. 2020YFA0907900), the Shenzhen Science and Technology Program  
352 (Grant No. KQTD2016113010482651), special funds for Science Technology  
353 Innovation and Industrial Development of Shenzhen Dapeng New District (Grant Nos.  
354 RC201901-05 and PT201901-19), the China Postdoctoral Science Foundation (Grant

355 No. 2020M672904), and the Basic and Applied Basic Research Fund of Guangdong

356 (Grant No. 2020A1515110912).

357 **Data availability**

358 All study data are included in the article and supporting information.

359

360 **References**

- 361 Alkan Turkucar, S., Aktas Karacelik, A., Karakose, M., 2021. Phenolic compounds,  
362 essential oil composition, and antioxidant activity of *Angelica purpurascens*  
363 (Ave-Lall.) Gill. *Turk J Chem.* 45(3), 956-966.  
364 <https://doi.org/10.3906/kim-2101-28>.
- 365 Chen, Q., Hu, Y., Wen, R., Wang, Y., Qin, L., Kong, B., 2021. Characterisation of the  
366 flavour profile of dry fermented sausages with different NaCl substitutes using  
367 HS-SPME-GC-MS combined with electronic nose and electronic tongue. *Meat*  
368 *Science.* 172, 108338. <https://doi.org/10.1016/j.meatsci.2020.108338>.
- 369 Chen, X.-P., Li, W., Xiao, X.-F., Zhang, L.-L., Liu, C.-X., 2013. Phytochemical and  
370 pharmacological studies on *Radix Angelica sinensis*. *Chinese Journal of*  
371 *Natural Medicines.* 11(6), 577-587.  
372 [https://doi.org/10.1016/s1875-5364\(13\)60067-9](https://doi.org/10.1016/s1875-5364(13)60067-9).
- 373 Chong, J., Xia, J., 2018. MetaboAnalystR: an R package for flexible and reproducible  
374 analysis of metabolomics data. *Bioinformatics.* 34(24), 4313-4314.  
375 <https://doi.org/10.1093/bioinformatics/bty528>.
- 376 Dong, H., Li, M., Jin, L., Xie, X., Li, M., Wei, J., 2022. Cool Temperature Enhances  
377 Growth, Ferulic Acid and Flavonoid Biosynthesis While Inhibiting  
378 Polysaccharide Biosynthesis in *Angelica sinensis*. *Molecules.* 27(1), 320.  
379 <https://doi.org/10.3390/molecules27010320>.
- 380 Du, J., Bai, B., Kuang, X., Yu, Y., Wang, C., Ke, Y., Xu, Y., Tzang, A. H., Qian, Z. M.,  
381 2006. Ligustilide inhibits spontaneous and agonists- or K+

- 382 depolarization-induced contraction of rat uterus. *J Ethnopharmacol.* 108(1),  
383 54-58. <https://doi.org/10.1016/j.jep.2006.04.011>.
- 384 Feng, T., Downie, S. R., Yu, Y., Zhang, X., Chen, W., He, X., Liu, S., 2009. Molecular  
385 systematics of *Angelica* and allied genera (Apiaceae) from the Hengduan  
386 Mountains of China based on nrDNA ITS sequences: phylogenetic affinities  
387 and biogeographic implications. *J Plant Res.* 122(4), 403-414.  
388 <https://doi.org/10.1007/s10265-009-0238-4>.
- 389 Guiné, R. P., Gonçalves, F. J., 2016. Bioactive Compounds in Some Culinary Aromatic  
390 Herbs and Their Effects on Human Health. *Mini Rev Med Chem.* 16(11),  
391 855-866. <https://doi.org/10.2174/1389557516666160211120540>.
- 392 Han, X., Li, C., Sun, S., Ji, J., Nie, B., Maker, G., Ren, Y., Wang, L., 2022. The  
393 chromosome-level genome of female ginseng (*Angelica sinensis*) provides  
394 insights into molecular mechanisms and evolution of coumarin biosynthesis.  
395 *Plant J.* 10.1111/tpj.16007. <https://doi.org/10.1111/tpj.16007>.
- 396 Hao, D.-c., Xiao, P.-g., 2020. Pharmaceutical resource discovery from traditional  
397 medicinal plants: Pharmacophylogeny and pharmacophylogenomics. *Chinese*  
398 *Herbal Medicines.* 12(2), 104-117.  
399 <https://doi.org/10.1016/j.chmed.2020.03.002>.
- 400 Hook, I. L. I., 2014. Danggui to *Angelica sinensis* root: Are potential benefits to  
401 European women lost in translation? A review. *Journal of Ethnopharmacology.*  
402 152(1), 1-13. <https://doi.org/https://doi.org/10.1016/j.jep.2013.12.018>.
- 403 Hua, Y. L., Ma, Q., Zhang, X. S., Yao, W. L., Ji, P., Hu, J. J., Wei, Y. M., 2019. Urinary

- 404 metabolomics analysis reveals the effect of volatile oil from *Angelica sinensis*  
405 on LPS-induced inflammation rats. *Biomed Chromatogr.* 33(2), e4402.  
406 <https://doi.org/10.1002/bmc.4402>.
- 407 Kang, K. B., Ernst, M., van der Hooft, J. J. J., da Silva, R. R., Park, J., Medema, M. H.,  
408 Sung, S. H., Dorrestein, P. C., 2019. Comprehensive mass spectrometry-guided  
409 phenotyping of plant specialized metabolites reveals metabolic diversity in the  
410 cosmopolitan plant family Rhamnaceae. *Plant J.* 98(6), 1134-1144.  
411 <https://doi.org/10.1111/tpj.14292>.
- 412 Katoh, K., Standley, D. M., 2013. MAFFT multiple sequence alignment software  
413 version 7: improvements in performance and usability. *Mol Biol Evol.* 30(4),  
414 772-780. <https://doi.org/10.1093/molbev/mst010>.
- 415 Kil, Y. S., Pham, S. T., Seo, E. K., Jafari, M., 2017. *Angelica keiskei*, an emerging  
416 medicinal herb with various bioactive constituents and biological activities.  
417 *Arch Pharm Res.* 40(6), 655-675. <https://doi.org/10.1007/s12272-017-0892-3>.
- 418 Kim, C., Mitchell, A., Kastner, D., Albright, C., Gutierrez, M., Glinkerman, C., Kulik,  
419 H., Weng, J. K., 2022. Emergence of a proton exchange-based isomerization  
420 and lactonization mechanism in the plant coumarin synthase COSY.  
421 10.1101/2022.07.19.500703. <https://doi.org/10.1101/2022.07.19.500703>.
- 422 Kim, D. W., Curtis-Long, M. J., Yuk, H. J., Wang, Y., Song, Y. H., Jeong, S. H., Park, K.  
423 H., 2014. Quantitative analysis of phenolic metabolites from different parts of  
424 *Angelica keiskei* by HPLC-ESI MS/MS and their xanthine oxidase inhibition.  
425 *Food Chem.* 153, 20-27. <https://doi.org/10.1016/j.foodchem.2013.12.026>.

- 426 Kumar, P., Rana, V., Singh, A. N., 2022. *Angelica glauca* Edgew. - A comprehensive  
427 review. *Journal of Applied Research on Medicinal and Aromatic Plants*. 31,  
428 100397. <https://doi.org/10.1016/j.jarmap.2022.100397>.
- 429 Lê, S., Josse, J., Husson, F., 2008. FactoMineR: An R Package for Multivariate  
430 Analysis. *Journal of statistical software*. 25(1), 1-18.  
431 <https://doi.org/10.18637/jss.v025.i01>.
- 432 Liang, H., Lin, X., Yang, P., Sun, Y., Wu, Q., Alimujiang, S., Zhao, H., Ma, D., Zhan, R.,  
433 Yang, J., 2022. Genome-Wide Identification of BAHD Superfamily and  
434 Functional Characterization of Bornyl Acetyltransferases Involved in the  
435 Bornyl Acetate Biosynthesis in *Wurfbainia villosa*. *Frontiers in Plant Science*.  
436 13, 860152. <https://doi.org/10.3389/fpls.2022.860152>.
- 437 Liu, P., Yang, H., Long, F., Hao, H. P., Xu, X., Liu, Y., Shi, X. W., Zhang, D. D., Zheng,  
438 H. C., Wen, Q. Y., Li, W. W., Ji, H., Jiang, X. J., Zhang, B. L., Qi, L. W., Li, P.,  
439 2014. Bioactive equivalence of combinatorial components identified in  
440 screening of an herbal medicine. *Pharm Res*. 31(7), 1788-1800.  
441 <https://doi.org/10.1007/s11095-013-1283-1>.
- 442 Ma, J., Huang, J., Hua, S., Zhang, Y., Zhang, Y., Li, T., Dong, L., Gao, Q., Fu, X., 2019.  
443 The ethnopharmacology, phytochemistry and pharmacology of *Angelica*  
444 *biserrata* - A review. *J Ethnopharmacol*. 231, 152-169.  
445 <https://doi.org/10.1016/j.jep.2018.10.040>.
- 446 Mazimba, O., 2017. Umbelliferone: Sources, chemistry and bioactivities review.  
447 *Bulletin of Faculty of Pharmacy, Cairo University*. 55(2), 223-232.

- 448 <https://doi.org/https://doi.org/10.1016/j.bfopcu.2017.05.001>.
- 449 Nguyen, L. T., Schmidt, H. A., von Haeseler, A., Minh, B. Q., 2015. IQ-TREE: a fast  
450 and effective stochastic algorithm for estimating maximum-likelihood  
451 phylogenies. *Mol Biol Evol.* 32(1), 268-274.  
452 <https://doi.org/10.1093/molbev/msu300>.
- 453 Oksanen, J., Blanchet, F. G., Kindt, R., Legendre, P., O'Hara, R. G., Simpson, G.,  
454 Solymos, P., Stevens, H., Wagner, H., 2013. Multivariate analysis of ecological  
455 communities in R: vegan tutorial. R package version 1.7.
- 456 Pandey, A. K., Kumar, P., Saxena, M., Maurya, P., 2020. Distribution of aromatic plants  
457 in the world and their properties. Elsevier Science Publishing Co Inc, United  
458 States.
- 459 Perveen, A., Ijaz, S., Ghaffar, N., 2020. Comparative phytochemical and  
460 physicochemical study of seeds of the genus *Angelica* L. from Neelum valley  
461 Azad Kashmir, Pakistan. *Pakistan Journal of Botany.* 52(1), 257-260.  
462 [https://doi.org/10.30848/pjb2020-1\(44\)](https://doi.org/10.30848/pjb2020-1(44)).
- 463 Rong, Y., Gu, X., Li, D., Chen, L., Zhang, Y., Wang, Z., 2021. Characterization of  
464 aroma, sensory and taste properties of *Angelica keiskei* tea. *European Food*  
465 *Research and Technology.* 247(7), 1665-1677.  
466 <https://doi.org/10.1007/s00217-021-03737-7>.
- 467 Sadgrove, N. J., Padilla-Gonzalez, G. F., Phumthum, M., 2022. Fundamental  
468 Chemistry of Essential Oils and Volatile Organic Compounds, Methods of  
469 Analysis and Authentication. *Plants (Basel).* 11(6), 789.

- 470 <https://doi.org/10.3390/plants11060789>.
- 471 Sarker, S. D., Nahar, L., 2004. Natural medicine: the genus *Angelica*. *Curr Med Chem.*
- 472 11(11), 1479-1500. <https://doi.org/10.2174/0929867043365189>.
- 473 Saslis-Lagoudakis, C. H., Klitgaard, B. B., Forest, F., Francis, L., Savolainen, V.,
- 474 Williamson, E. M., Hawkins, J. A., 2011. The use of phylogeny to interpret
- 475 cross-cultural patterns in plant use and guide medicinal plant discovery: an
- 476 example from *Pterocarpus* (Leguminosae). *PLoS One.* 6(7), e22275.
- 477 <https://doi.org/10.1371/journal.pone.0022275>.
- 478 Song, H. P., Wu, S. Q., Hao, H., Chen, J., Lu, J., Xu, X., Li, P., Yang, H., 2016. A
- 479 chemical family-based strategy for uncovering hidden bioactive molecules and
- 480 multicomponent interactions in herbal medicines. *Sci Rep.* 6, 23840.
- 481 <https://doi.org/10.1038/srep23840>.
- 482 Sowndhararajan, K., Deepa, P., Kim, M., Park, S. J., Kim, S., 2017. A Review of the
- 483 Composition of the Essential Oils and Biological Activities of *Angelica* Species.
- 484 *Sci Pharm.* 85(3), 33. <https://doi.org/10.3390/scipharm85030033>.
- 485 Vanholme, R., Sundin, L., Seetso, K. C., Kim, H., Liu, X., Li, J., De Meester, B.,
- 486 Hoengenaert, L., Goeminne, G., Morreel, K., Haustraete, J., Tsai, H. H.,
- 487 Schmidt, W., Vanholme, B., Ralph, J., Boerjan, W., 2019. COSY catalyses
- 488 trans-cis isomerization and lactonization in the biosynthesis of coumarins. *Nat*
- 489 *Plants.* 5(10), 1066-1075. <https://doi.org/10.1038/s41477-019-0510-0>.
- 490 Wei, W. L., Zeng, R., Gu, C. M., Qu, Y., Huang, L. F., 2016. *Angelica sinensis* in
- 491 China-A review of botanical profile, ethnopharmacology, phytochemistry and



- 492 chemical analysis. *J Ethnopharmacol.* 190, 116-141.
- 493 <https://doi.org/10.1016/j.jep.2016.05.023>.
- 494 Wu, L., Wang, X., Xu, W., Farzaneh, F., Xu, R., 2009. The structure and
- 495 pharmacological functions of coumarins and their derivatives. *Curr Med Chem.*
- 496 16(32), 4236-4260. <https://doi.org/10.2174/092986709789578187>.
- 497 Wu, T., Hu, E., Xu, S., Chen, M., Guo, P., Dai, Z., Feng, T., Zhou, L., Tang, W., Zhan, L.,
- 498 Fu, X., Liu, S., Bo, X., Yu, G., 2021. clusterProfiler 4.0: A universal enrichment
- 499 tool for interpreting omics data. *Innovation (Camb).* 2(3), 100141.
- 500 <https://doi.org/10.1016/j.xinn.2021.100141>.
- 501 Yeh, J. C., Cindrova-Davies, T., Belleri, M., Morbidelli, L., Miller, N., Cho, C. W.,
- 502 Chan, K., Wang, Y. T., Luo, G. A., Ziche, M., Presta, M., Charnock-Jones, D. S.,
- 503 Fan, T. P., 2011. The natural compound n-butylidenephthalide derived from the
- 504 volatile oil of *Radix Angelica sinensis* inhibits angiogenesis in vitro and in vivo.
- 505 *Angiogenesis.* 14(2), 187-197. <https://doi.org/10.1007/s10456-011-9202-8>.
- 506 Zhang, H. Y., Bi, W. G., Yu, Y., Liao, W. B., 2012. *Angelica sinensis* (Oliv.) Diels in
- 507 China: distribution, cultivation, utilization and variation. *Genetic Resources*
- 508 *and Crop Evolution.* 59(4), 607-613.
- 509 <https://doi.org/10.1007/s10722-012-9795-9>.
- 510 Zhou, D., Li, N., Zhang, Y., Yan, C., Jiao, K., Sun, Y., Ni, H., Lin, B., Hou, Y., 2016.
- 511 Biotransformation of neuro-inflammation inhibitor kellerin using *Angelica*
- 512 *sinensis* (Oliv.) Diels callus. *RSC Advances.* 6(99), 97302-97312.
- 513 <https://doi.org/10.1039/c6ra22502k>.



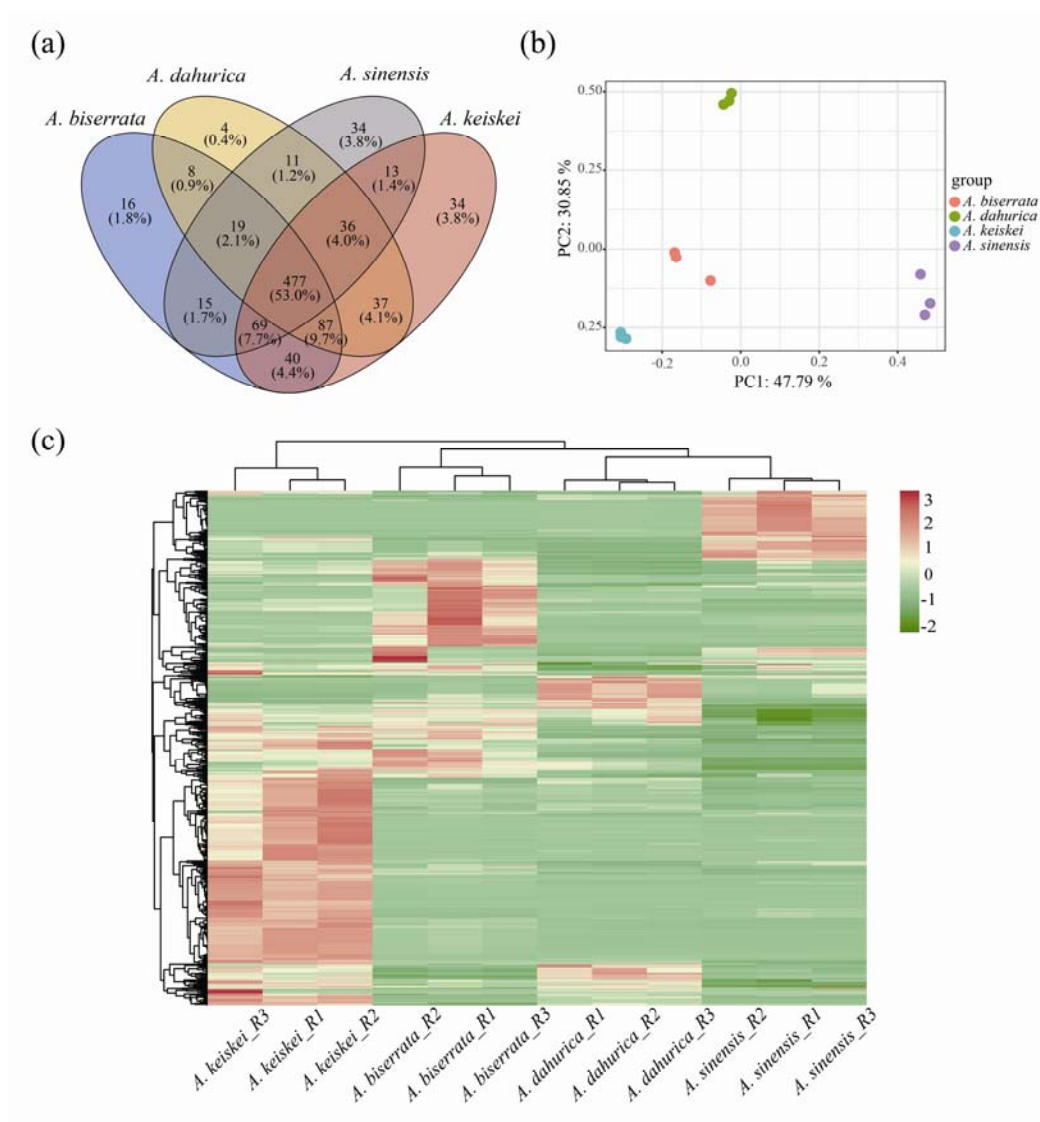

515

516 Fig. 1. An overview of volatile metabolites among four *Angelica* species. (a) Venn diagram

517 showing the number of common and specific metabolites in the four species. (b) PCA of

518 volatile metabolites for the four species with three biological replicates. (c) Heatmap

519 clustering of volatile metabolites identified from the four species. Volatile metabolite

520 abundance was z-score transformed.

521 Note: The color-coded scale grading from green to red corresponds to the content of volatile

522 metabolites shifting from low to high.

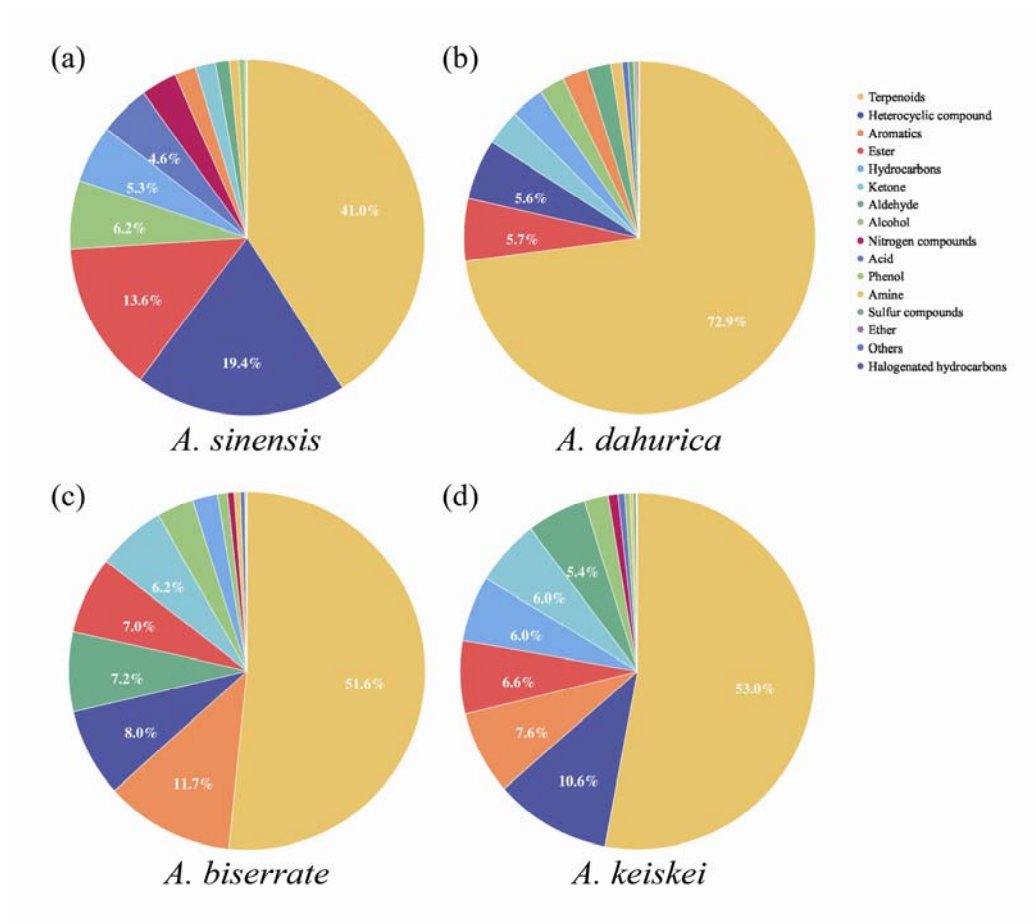

523

524 Fig. 2. Classification and proportion of volatile metabolites detected in the four Angelica

525 species. (a) *A. sinensis*, (b) *A. dahurica*, (c) *A. biserrate*, (d) *A. keiskei*.

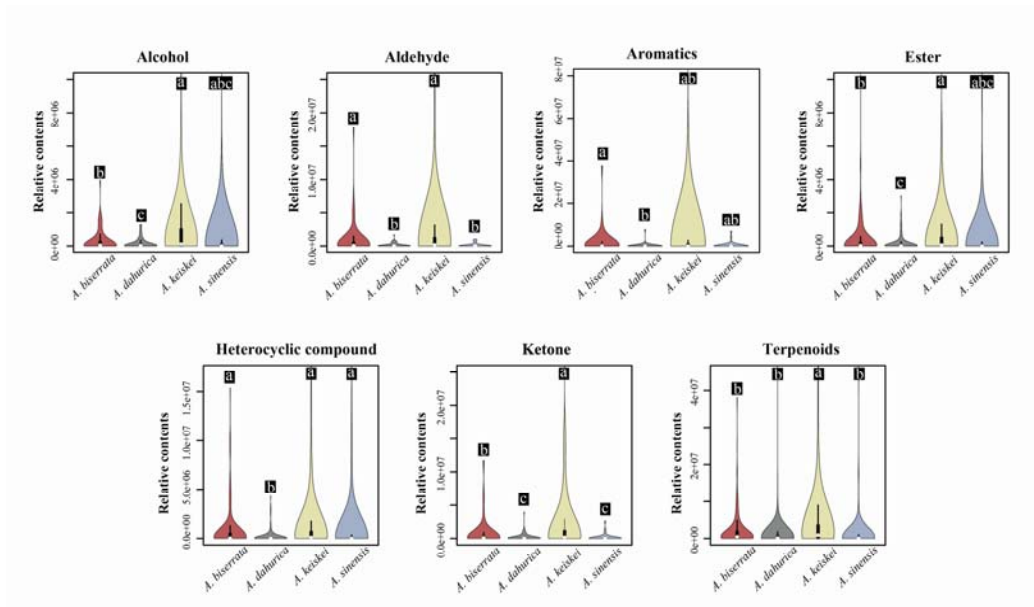

526

527 Fig. 3. Comparison for the relative abundance of seven categories (alcohol, aromatics,  
528 aldehyde, ester, heterocyclic compounds, ketone and terpenoids) with significant differences  
529 in the four *Angelica* species.

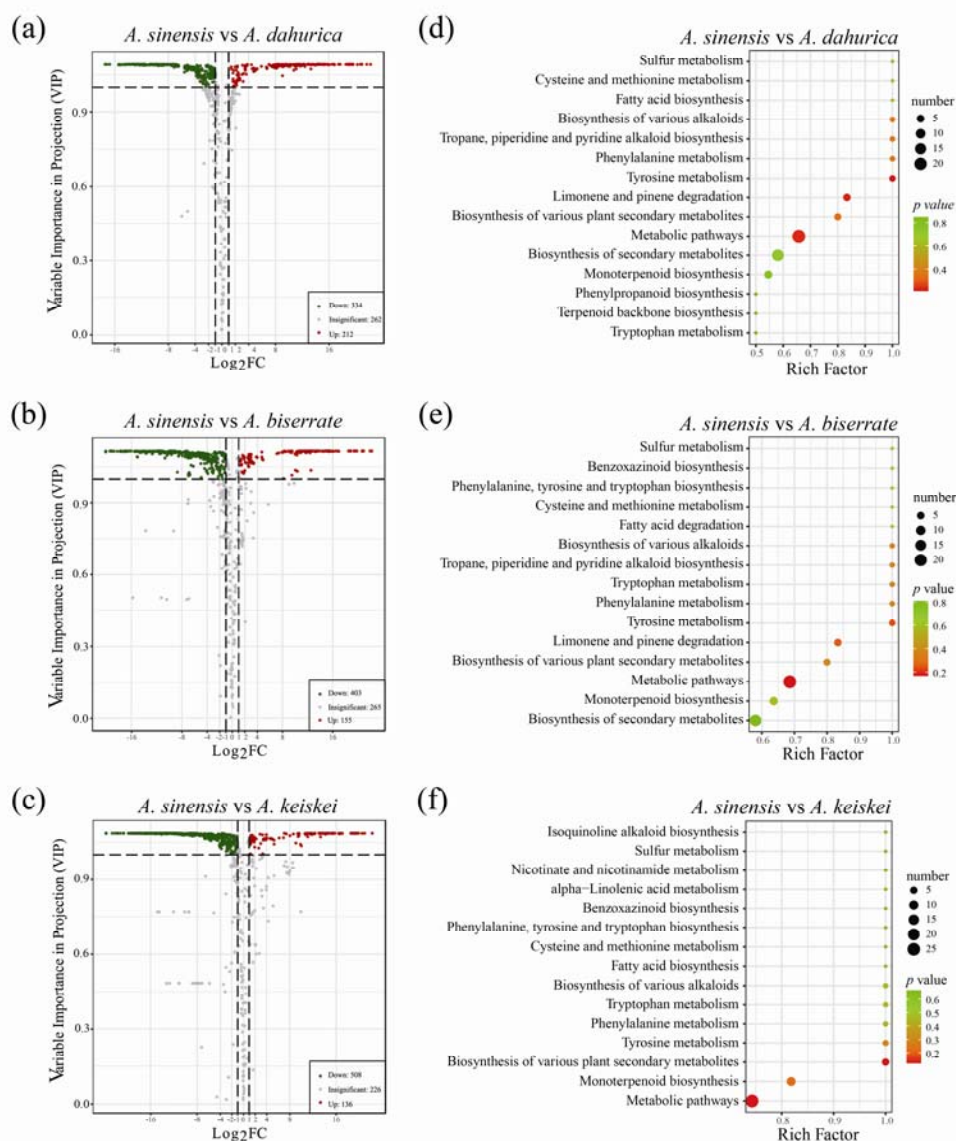

530

531 Fig. 4. The overall distribution and KEGG enrichment analysis of differential metabolites

532 between *A. sinensis* and the three other *Angelica* species. (a-c) Volcano plots for differential

533 metabolites between *A. sinensis* and the three other *Angelica* species. (a) *A. sinensis* vs *A.*

534 *dahurica*. (b) *A. sinensis* vs *A. biserrate*. (c) *A. sinensis* vs *A. keiskei*. Colors of metabolites

535 indicated significant differences (red, upregulated; green, downregulated). (d-f) KEGG

536 pathway enrichment analysis of differential metabolites for *A. sinensis* vs *A. dahurica* (d), *A.*

537 *sinensis* vs *A. biserrate* (e) and *A. sinensis* vs *A. keiskei* (f).

538 Note: Color of the bubbles represented statistical significance of the enriched terms, and the

539 size of the bubbles represented number of differentially enriched metabolites. The pathway of

540 “Biosynthesis of various plant secondary metabolites” including: crocin biosynthesis,  
541 cannabidiol biosynthesis, mugineic acid biosynthesis, pentagalloylglucose biosynthesis,  
542 benzoxazinoid biosynthesis, gramine biosynthesis, coumarin biosynthesis, furanocoumarin  
543 biosynthesis, hordatine biosynthesis, podophyllotoxin biosynthesis.

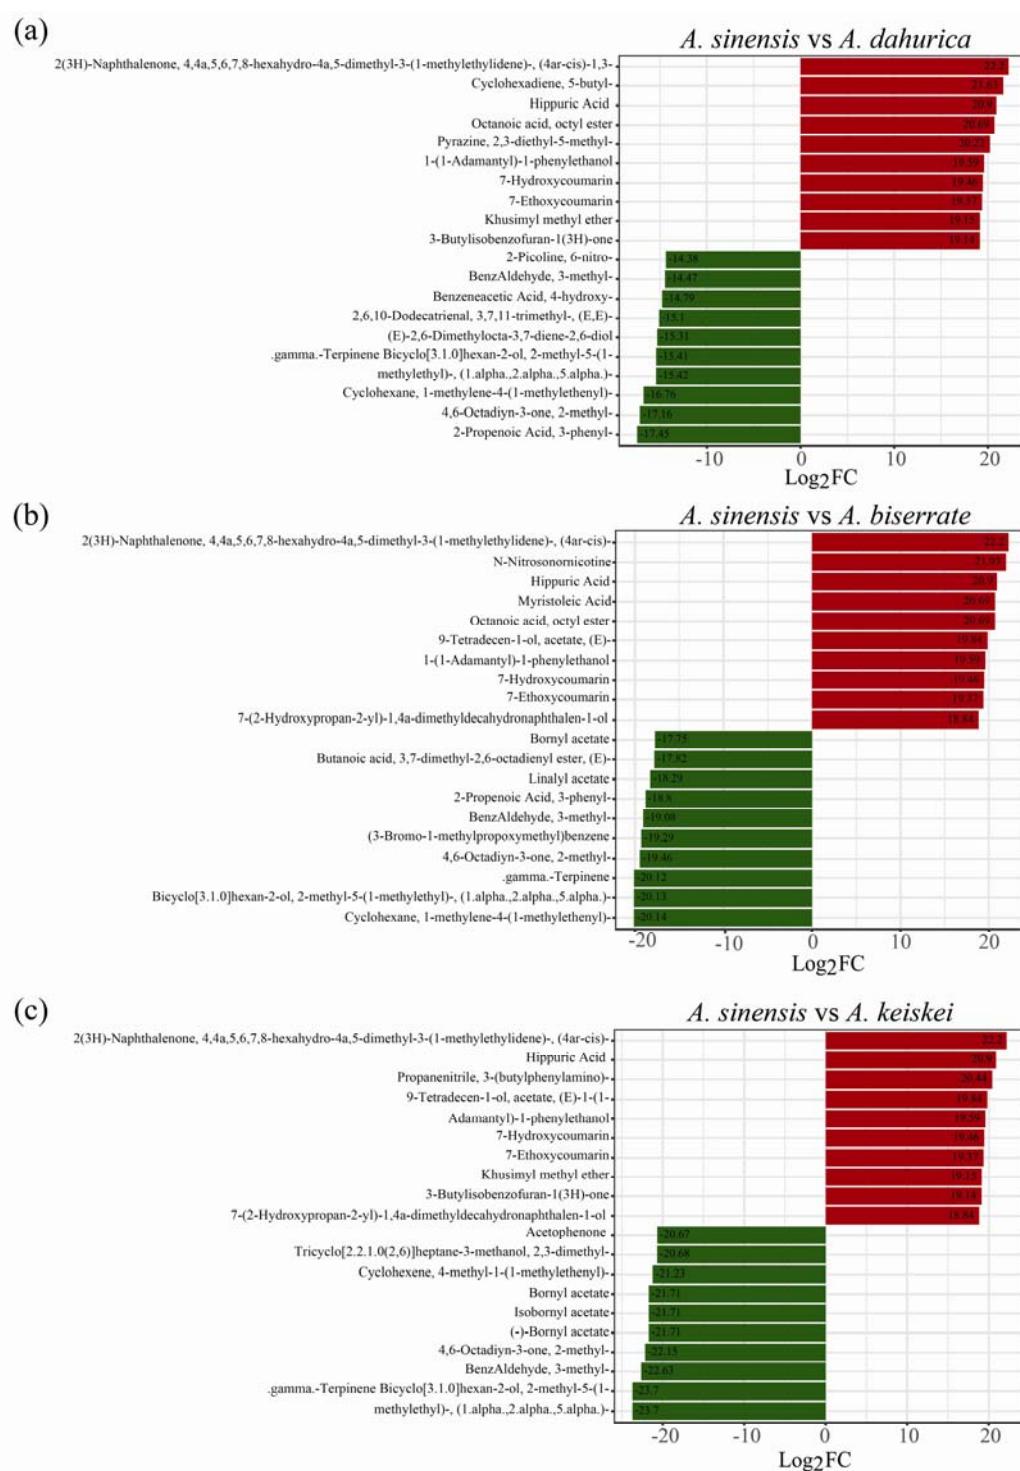

544

545 Fig. 5. The top 20 metabolites of significantly differential volatiles between *A. sinensis* and

546 three other *Angelica* species. Red indicated the more abundant metabolites in *A. sinensis*

547 compared to *A. dahurica* (a), *A. biserrate* (b), *A. keiskei* (c). Green indicated the lower levels

548 of metabolites in *A. sinensis* than that in other species.



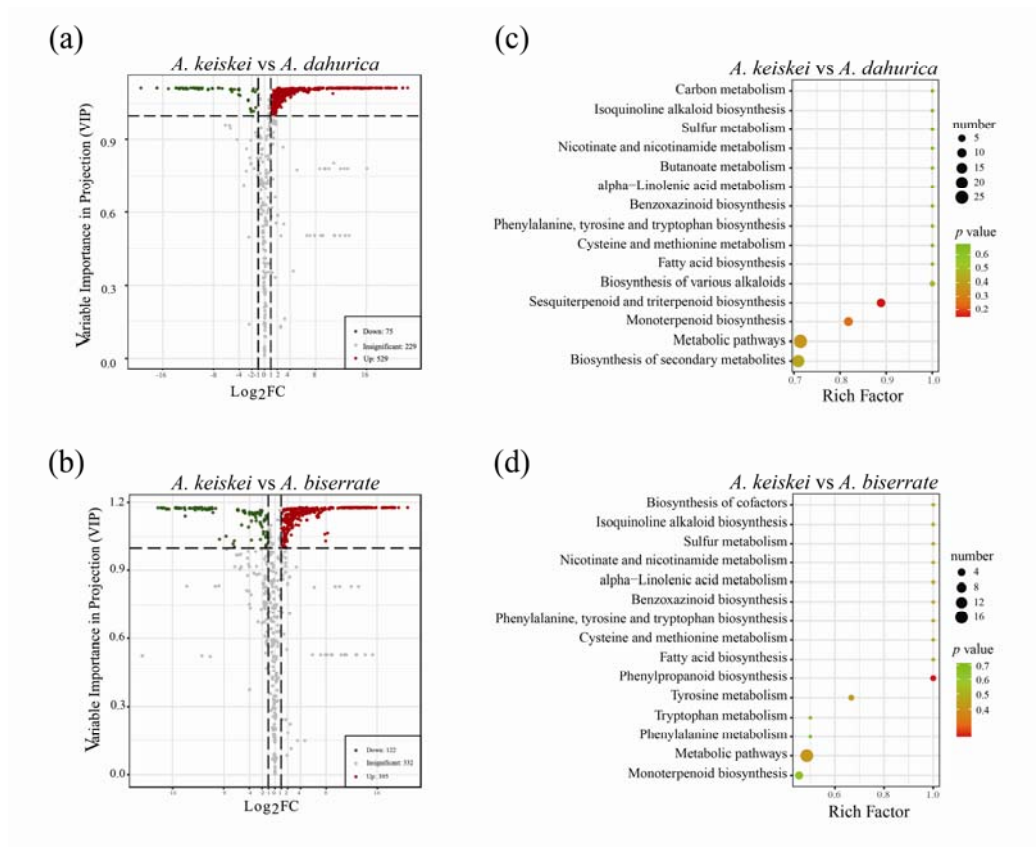

549

550

Fig. 6. The overall distribution and KEGG enrichment analysis of differential metabolites

551

between *A. keiskei* and *A. dahurica* (a, c), *A. keiskei* and *A. biserrate* (b, d). (a-b) Volcano

552

plots for differential metabolites. The colors of metabolites indicated significant differences

553

(red, upregulated; green, downregulated). (c-d) KEGG pathway enrichment analysis of

554

differential metabolites.

555

Note: Color of the bubbles represented statistical significance of the enriched terms, and the

556

size of the bubbles represented number of differential metabolites.

557

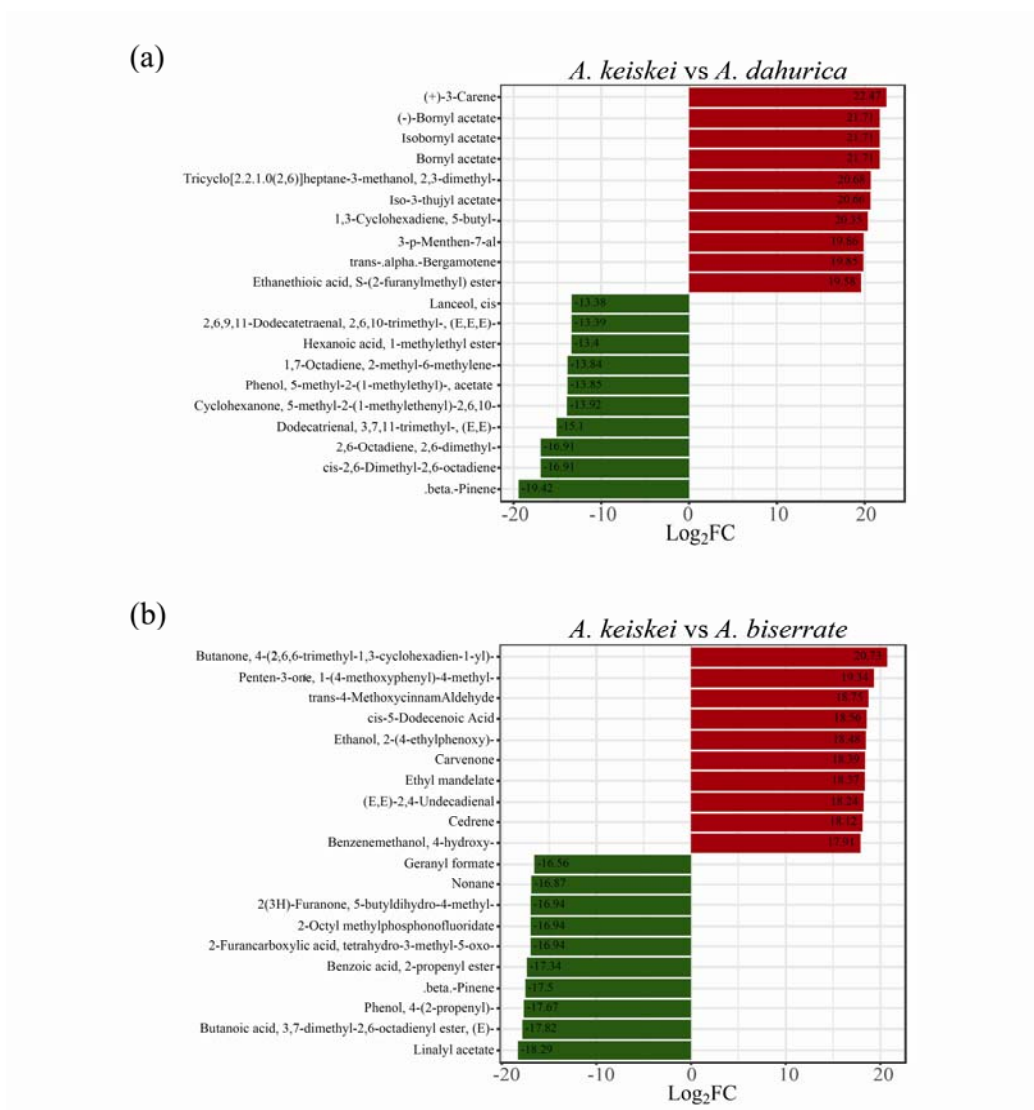

558

559 Fig. 7. Top 20 metabolites with significant difference between *A. keiskei* and *A. dahurica* (a),

560 *A. keiskei* and *A. biserrate* (b).

561 Note: Red and green represent up-regulated and down-regulated metabolites in *A. keiskei*,

562 respectively.

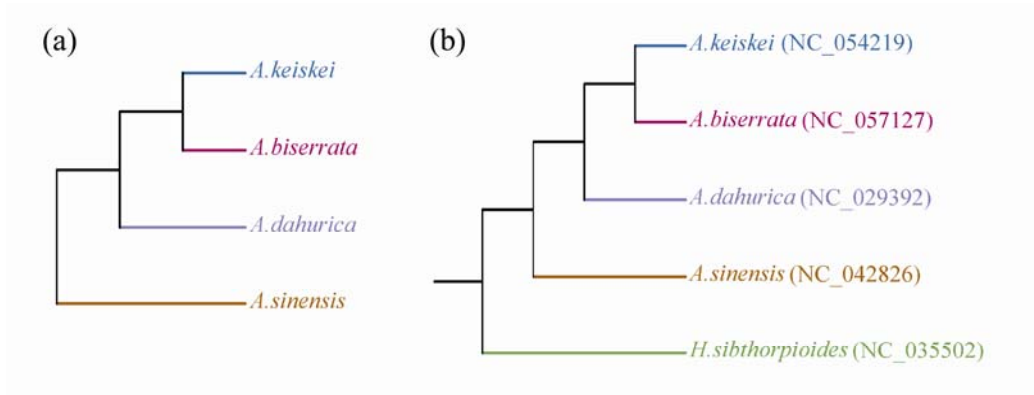

563

564 Fig. 8. Hierarchical clustering based on the similarity of volatile metabolites (a) and  
565 phylogenetic tree of the four *Angelica* species and *H. sibthorpioides* (b). The chloroplast  
566 sequences above were available in GenBank of NCBI at [<https://www.ncbi.nlm.nih.gov>].
